# Supplementary material
Source: PubMed Central journal article supplement (PMC7960381)
Supplement: 16-00984.pdf [file 16-00984.pdf]

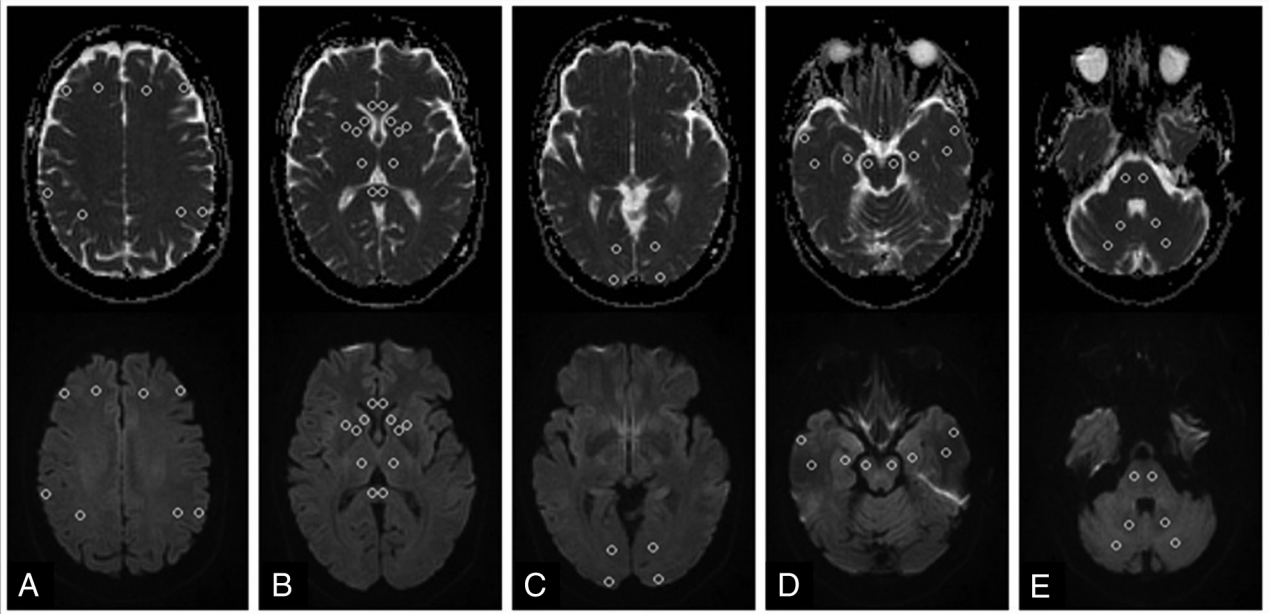

**ON-LINE FIGURE.** Bilateral, symmetrically placed ROIs covering frontal gray and white matter, parietal gray and white matter (A); genu, splenium, caudate, lentiform nucleus, internal capsule, and thalamus (B); occipital gray and white matter (C); temporal gray and white matter, hippocampus, and midbrain (D); and pons, cerebellar gray and white matter (E).
